# Supplementary material for: Construction and Characterization of Polyolefin Elastomer Blends with Chemically Modified Hydrocarbon Resin as a Photovoltaic Module Encapsulant
Source: MDPI journal article supplement (doi:10.3390/polym14214620), 2022-10-31
Supplement: s1 [file s1]

**Supporting Information for;**

**Construction of Adhesion-enhanced Polyolefin Elastomer Encapsulant using Chemically Modified Hydrocarbon Resin for Construction and Characterization of Polyolefin Elastomer Blends with Chemically Modified Hydrocarbon Resin as a Photovoltaic Module Encapsulant**

**Jin Hwan Park and Seok-Ho Hwang \***

Materials Chemistry and Engineering Laboratory, Department of Polymer Science and Engineering, Dankook University, Yongin 16890, Gyeonggi-do, Korea;  
shssh123@gmail.com

\* Correspondence: bach@dankook.ac.kr; Tel.: +82-31-8005-3588

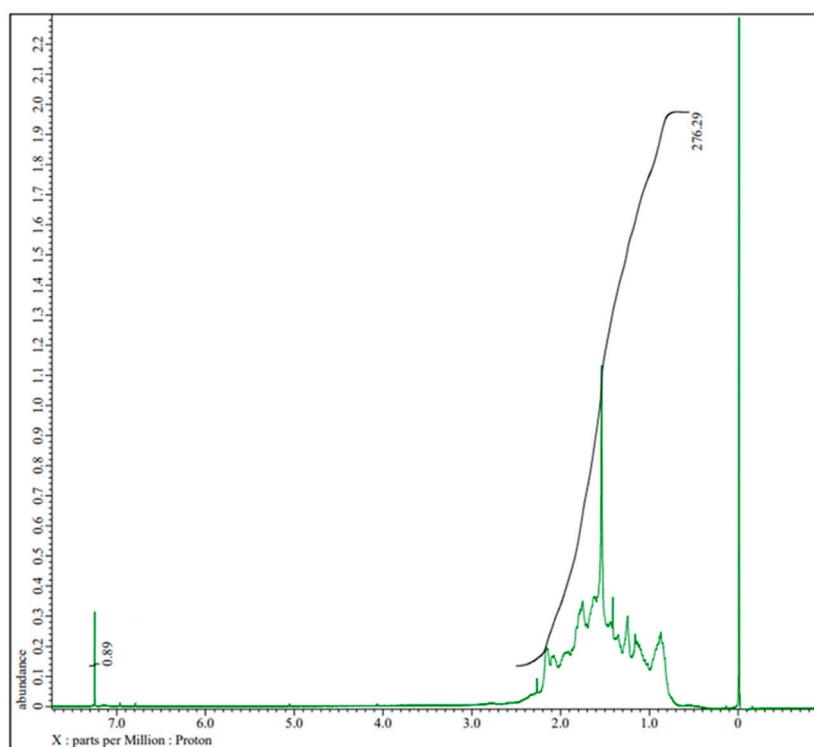

(A)

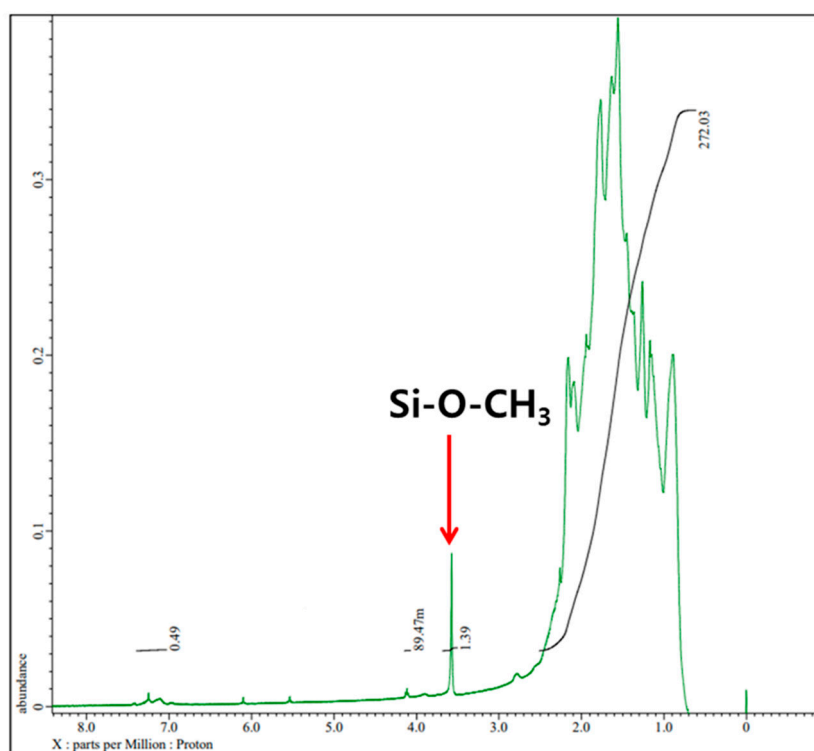

(B)

**Figure S1.**  $^1\text{H}$  NMR spectra of the neat HCR (A) and *m*-HCR (B).

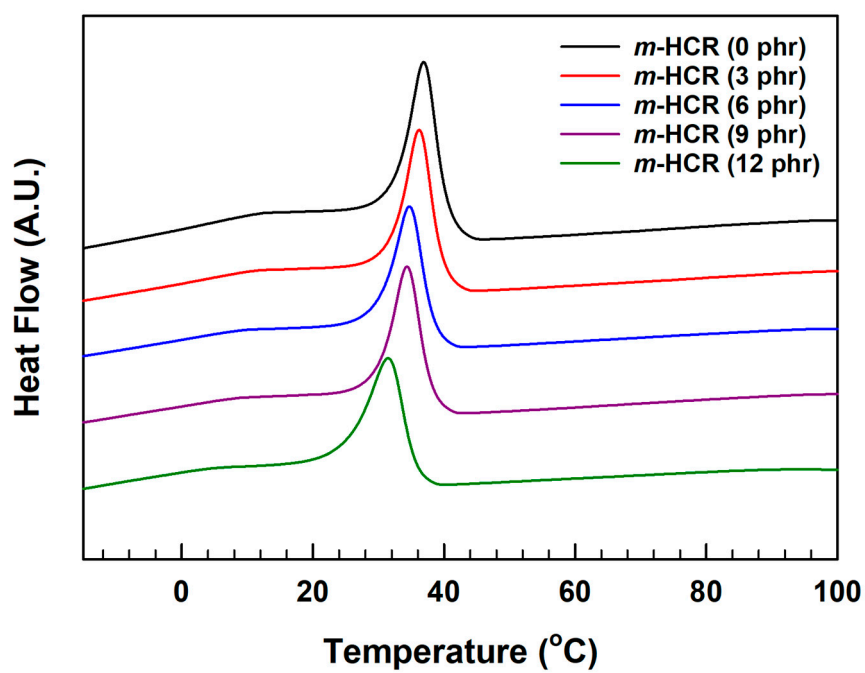

(A)

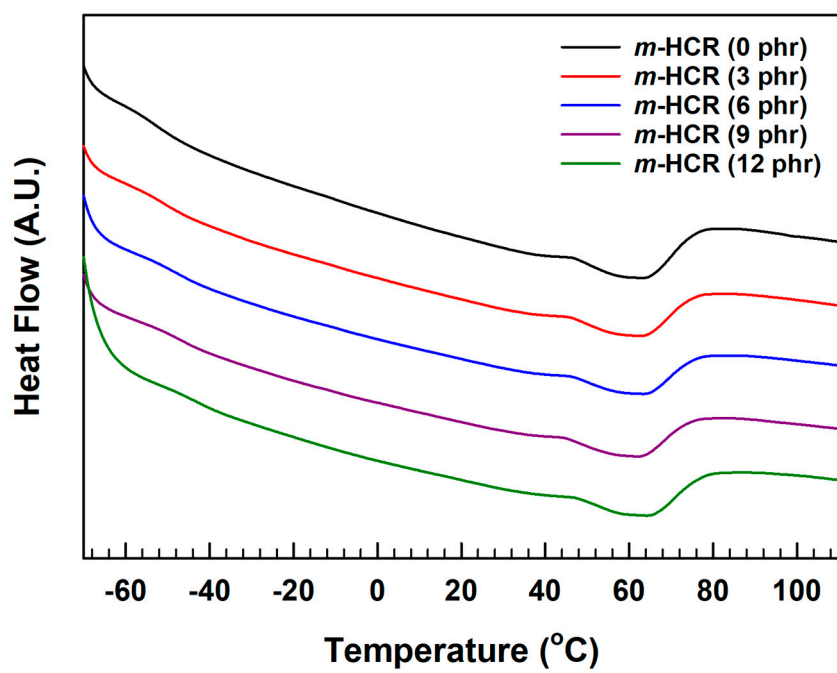

(B)

<Continued>

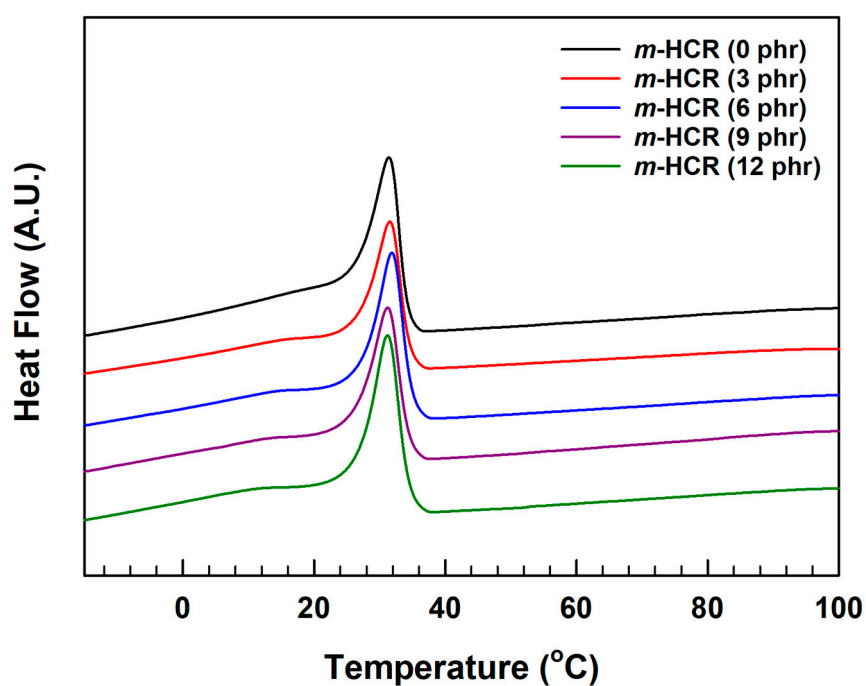

(C)

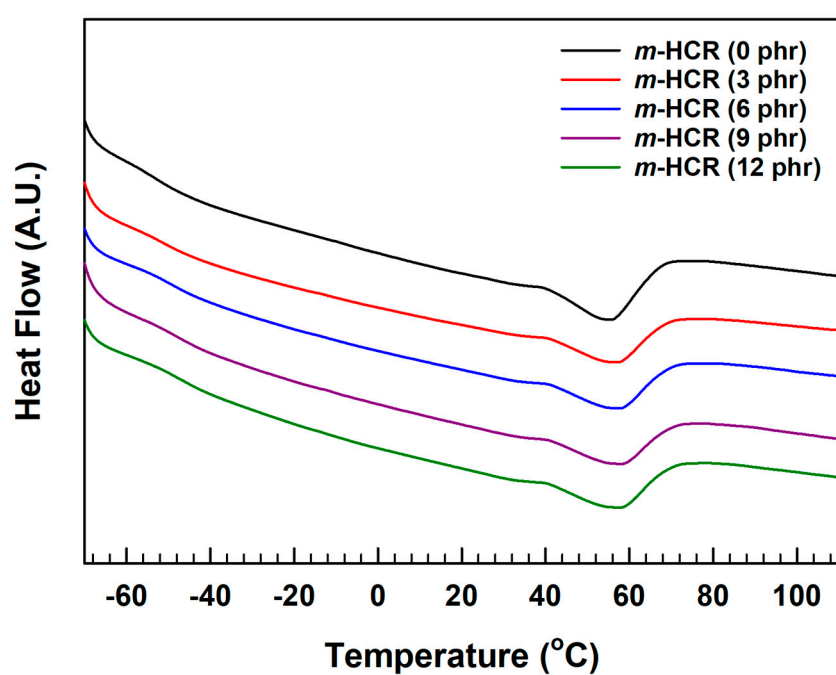

(D)

**Figure S2.** DSC thermograms of neat POE and POE blends with *m*-HCR: (A) cooling scan, (B) 2<sup>nd</sup> heating scans for uncrosslinked samples and (C) cooling scan, (B) 2<sup>nd</sup> heating scan for crosslinked samples

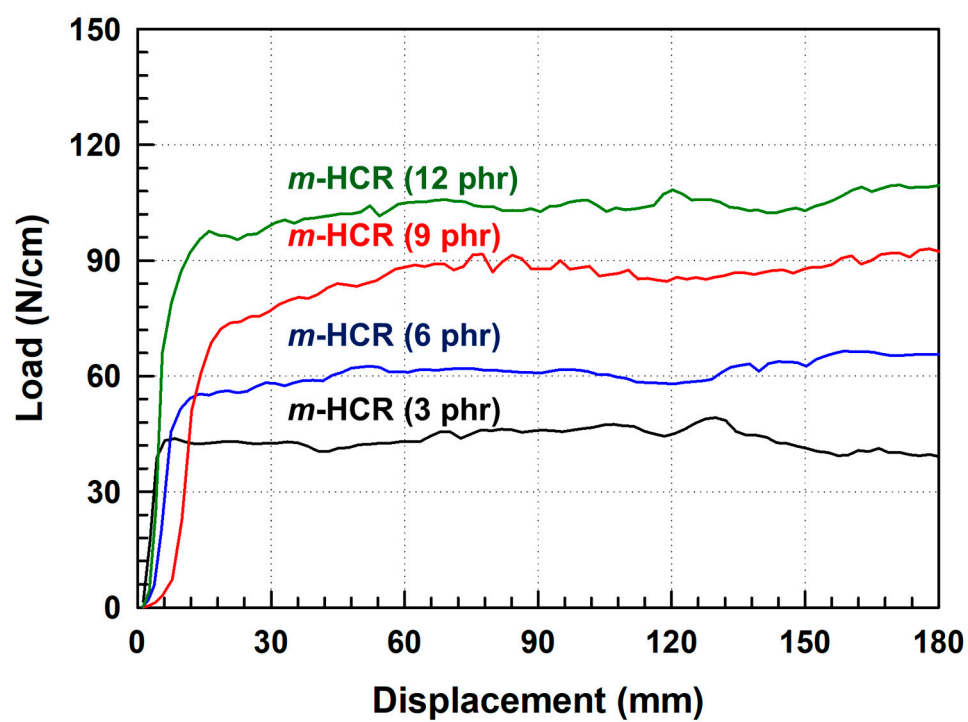

**Figure S3.** 180° Peel test profiles for POE blends with *m*-HCR.
